# Supplementary material for: Ordered Changes in Methane Production Performance and Metabolic Pathway Transition of Methanogenic Archaea under Gradually Increasing Sodium Propionate Stress Intensity
Source: MDPI journal article supplement (doi:10.3390/fermentation10040201), 2024-04-08
Supplement: s1 [file s1]

SUPPLEMENTARY DATA

# Ordered changes in methane production function and metabolic pathway transition of methanogens under gradually increasing sodium propionate stress intensity

Manuscript submitted to *Fermentation*

March 2024

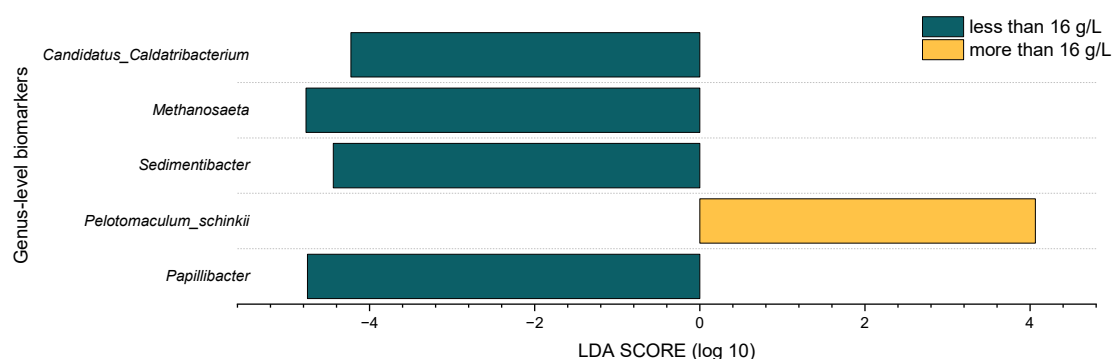

**Figure S1.** Biomarkers of microorganisms at subordinate levels of high and low concentration levels of sodium propionate conditions during AD under relatively stringent conditions (LDA > 4.0).

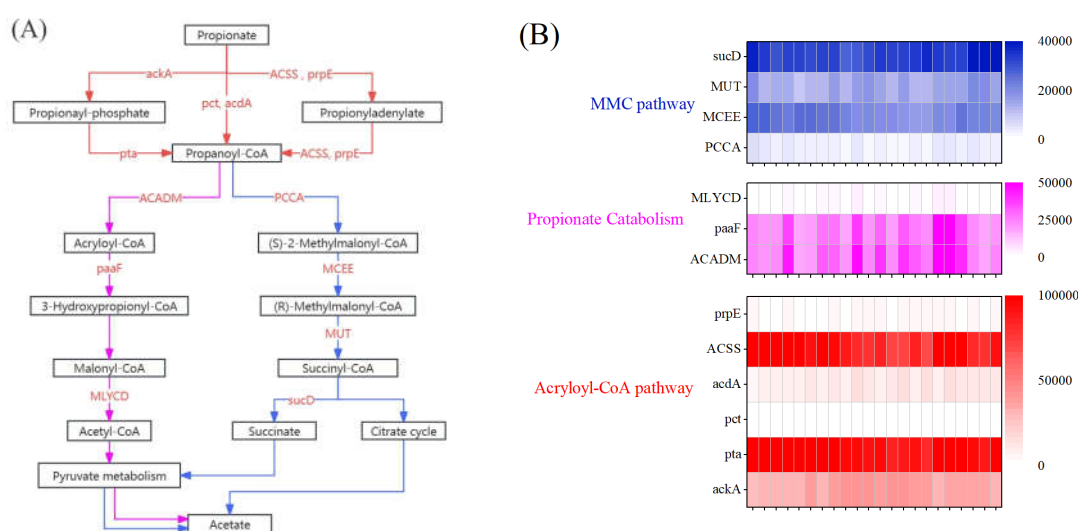

**Figure S2.** (A) The networks of propionate metabolism and (B) absolute abundance of key genes during the operation of AD at different sodium propionate contents.
